# Supplementary material
Source: PubMed Central journal article supplement (PMC4261112)
Supplement: 97320630010684S1.pdf [file 97320630010684S1.pdf]

## Supplementary material:

**Table 1:** The primary targets of thymoquinone identified from reverse screening approaches

| PDB ID | Protein Target                                | Procedure of reverse screening  | Experimental Evidence | Binding energy (kcal/mol) |
|--------|-----------------------------------------------|---------------------------------|-----------------------|---------------------------|
| 2FGI   | Basic fibroblast growth factor receptor 1     | PharmMapper/<br>ReverseScreen3D | CancerResource        | -4.65                     |
| 1P62   | Deoxycytidine kinase                          | PharmMapper                     | CancerResource        | -4.75                     |
| 2X0V   | Cellular tumor antigen p53                    | ReverseScreen3D                 | NPACT                 | -4.6                      |
| 1DB1   | Vitamin D3 receptor                           | PharmMapper/<br>ReverseScreen3D | CancerResource        | -5.17                     |
| 1R9O   | Cytochrome P450 2CP                           | PharmMapper/<br>ReverseScreen3D | CancerResource        | -4.63                     |
| 1E3G   | Androgen receptor                             | PharmMapper/<br>ReverseScreen3D | CancerResource        | -5.28                     |
| 2C6T   | Cyclin A2                                     | PharmMapper                     | CancerResource        | -4.77                     |
| 3BL1   | Carbonic Anhydrase II                         | PharmMapper/<br>ReverseScreen3D | CancerResource        | -4.33                     |
| 1HFQ   | Dihydrofolate reductase                       | PharmMapper/<br>ReverseScreen3D | CancerResource        | Error                     |
| 3CP9   | Vascular endothelial growth factor 2          | PharmMapper/<br>ReverseScreen3D | CancerResource        | -7.57                     |
| 1B41   | Acetylcholine esterase                        | Target Hunter                   | NCBI PubChem          | -4.09                     |
| 2QG0   | Heat shock protein HSP-90 alpha               | PharmMapper                     | CancerResource        | -4.14                     |
| 3F7H   | Baculoviral IAP repeat-containing protein 7   | PharmMapper/<br>ReverseScreen3D | CancerResource        | -3.73                     |
| 2FZ8   | Aldose reductase                              | PharmMapper/<br>ReverseScreen3D | CancerResource        | -5.99                     |
| 1RW8   | TGF-beta receptor type-1                      | PharmMapper/<br>ReverseScreen3D | CancerResource        | -5.21                     |
| 1GRE   | Glutathione reductase, mitochondrial          | PharmMapper                     | CancerResource        | -4.65                     |
| 2R7B   | 3-phosphoinositide-dependent protein kinase 1 | PharmMapper/<br>ReverseScreen3D | CancerResource        | -4.59                     |
| 1NME   | Caspase 3                                     | ReverseScreen3D                 | CancerResource        | -3.99                     |
| 1YSG   | Apoptosis regulator Bcl-X                     | ReverseScreen3D                 | NPACT                 | -3.89                     |
| 3PXZ   | Cell division protein kinase 2                | PharmMapper,<br>ReverseScreen3D | CancerResource        | -5.21                     |
| 1GKC   | Matrix metalloprotease 9                      | PharmMapper,<br>ReverseScreen3D | CancerResource        | -5.64                     |
| 2RG6   | MAP kinase 14                                 | PharmMapper,<br>ReverseScreen3D | CancerResource        | -4.81                     |
